# Supplementary material for: Chirurgisches Nahtmaterial – Grundlagen
Source: Springer Nature journal article supplement (doi:10.1007/s00064-023-00812-y), 2023-08-21
Supplement: MOESM1 [file 25944350]

Tabelle 1

| Fadenmaterial<br>Symbol                                                             | engl. Bedeutung                                         | deutsche Bedeutung                                                    |
|-------------------------------------------------------------------------------------|---------------------------------------------------------|-----------------------------------------------------------------------|
| 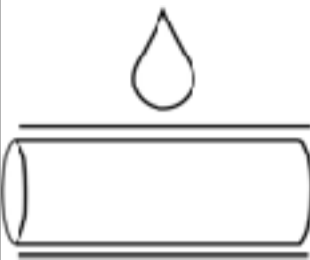   | undyed /<br>monofilament /<br>nonabsorbable /<br>coated | ungefärbt / monofil / nicht<br>resorbierbar / beschichtet             |
|   | dyed / braided /<br>nonabsorbable                       | eingefärbt / geflochten /<br>nicht resorbierbar                       |
|  | dyed / braided /<br>coated /<br>absorbable              | gefärbt / geflochten /<br>beschichtet / resorbierbar                  |
|  | dyed /<br>monofilament /<br>absorbable                  | eingefärbt / monofil /<br>resorbierbar                                |
|  | undyed / braided /<br>coated /<br>absorbable            | ungefärbt / geflochten /<br>beschichtet<br>beschichtet / resorbierbar |
|  | undyed /<br>monofilament /<br>absorbable                | ungefärbt / monofil /<br>resorbierbar                                 |

| Fadenmaterial<br>Symbol                                                             | engl. Bedeutung                            | deutsche Bedeutung                                        |
|-------------------------------------------------------------------------------------|--------------------------------------------|-----------------------------------------------------------|
|    | dyed / braided / coated / nonabsorbable    | gefärbt / geflochten / beschichtet / nicht resorbierbar   |
|    | dyed / twisted / coated nonabsorbable      | gefärbt / gezwirnt / beschichtet / nicht resorbierbar     |
|   | dyed / monofilament / nonabsorbable        | gefärbt / monofil / nicht resorbierbar                    |
|  | dyed / monofilament / coated nonabsorbable | eingefärbt / monofil / beschichtet / nicht resorbierbar   |
|  | undyed / braided / coated / nonabsorbable  | ungefärbt / geflochten / beschichtet / nicht resorbierbar |
|  | undyed / twisted / nonabsorbable           | ungefärbt / gezwirnt / nicht resorbierbar                 |
|  | undyed / twisted / nonabsorbable           | ungefärbt / gezwirnt / nicht resorbierbar                 |

| Fadenmaterial<br>Symbol                                                                                                                                                                                       | engl. Bedeutung                             | deutsche Bedeutung                          |
|---------------------------------------------------------------------------------------------------------------------------------------------------------------------------------------------------------------|---------------------------------------------|---------------------------------------------|
| 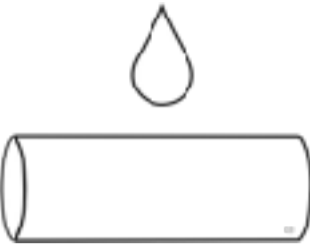                                                                                                                             | undyed /<br>monofilament /<br>nonabsorbable | ungefärbt / monofil / nicht<br>resorbierbar |
| modifiziert nach EUROPÄISCHE VEREINIGUNG DER HERSTELLER VON<br>CHIRURGISCHEM NAHTMATERIAL E. V., BERLIN, 10117 Berlin, Reinhardtstr. 29 b<br>EASSI – The European Association of the Surgical Suture Industry |                                             |                                             |
