# Supplementary material for: Chirurgisches Nahtmaterial – Grundlagen
Source: Springer Nature journal article supplement (doi:10.1007/s00064-023-00812-y), 2023-08-21
Supplement: MOESM2 [file 25944350]

Tabelle 1

| resorbierbare Nahtmaterialien           |                                                       | EASSI Symbole                                                                       | EASSI Symbole                                                                       | Abkürzung Rohstoff | Handelsname Medtronic* | Covidien Tyco (USSC/ | Ethicon *            | B. Braun *    | Resorba*       | Serag-Wiessner* | ungefärbt | Farbe   | Fadenaufbau | Beschichtung                     | Widerhaken | Reissfestigkeit I                                                                                      | Reissfestigkeit II | Reisskraft ca. [T] 50% | Reisskraft ca. [T] 0% | Resorption komplett [T] | Hinweis |
|-----------------------------------------|-------------------------------------------------------|-------------------------------------------------------------------------------------|-------------------------------------------------------------------------------------|--------------------|------------------------|----------------------|----------------------|---------------|----------------|-----------------|-----------|---------|-------------|----------------------------------|------------|--------------------------------------------------------------------------------------------------------|--------------------|------------------------|-----------------------|-------------------------|---------|
| Polyglykolsäure                         |                                                       |                                                                                     |    | PGA                | Marlin?                |                      |                      | Safil         |                |                 |           |         | geflochten  | +                                |            |                                                                                                        |                    | 14-16                  | 28-35                 | 90                      |         |
| Polyglykolsäure                         |                                                       |                                                                                     |    | PGA                | Marlin rapid?          |                      |                      |               |                |                 |           |         | geflochten  | +                                |            |                                                                                                        |                    | 7                      | 21                    | 42                      |         |
| Polyglykolsäure                         | Polyglyton 621                                        |    |    | PGA                |                        | Caprosyn             | Vicryl rapid         | Safil Quick   |                |                 | +         |         | geflochten  | Magnesium Stearat                |            |                                                                                                        |                    | 5-6-8                  |                       | 42-45-50                |         |
| Polyglykolsäure                         |                                                       |    |    | PGA                |                        | Polysorb/Dexon       | Vicryl               | Safil         |                | Serafit         | +         | Violett | geflochten  | Polyglykonat?                    |            |                                                                                                        |                    | 18-21                  |                       | 60-90                   |         |
|                                         | lactomer 9-1                                          |                                                                                     |                                                                                     |                    |                        | Polysorb             |                      |               |                |                 |           |         |             |                                  |            |                                                                                                        |                    |                        |                       |                         |         |
| Polyglykolsäure                         |                                                       |    |    | PGA                |                        |                      |                      |               |                | Serafit         | +         | Violett | geflochten  | +                                |            |                                                                                                        |                    | 15-20                  |                       | 60-90                   |         |
| Polyglykolsäure                         |                                                       |    |    | PGA                |                        |                      |                      |               | PGA resoquick™ | Serapid         | +         |         | geflochten  | +                                |            |                                                                                                        |                    | 5-7                    |                       | 42                      |         |
| Polycaprolacton-Lactid (PCL)            |                                                       |                                                                                     |                                                                                     | PCL                |                        |                      |                      |               |                |                 |           |         | monofil     | +                                |            |                                                                                                        |                    | 42-50                  | 90-100                | 180-210                 |         |
| Polyglykolsäure-Caprolacton             | Poly(Glykolsäure-co-ε-Caprolacton)                    |    |    |                    |                        |                      |                      |               | Glycolon       | Serafast        | +         | Violett | monofil     | ø                                |            |                                                                                                        |                    | 8-13                   |                       | 90-120                  |         |
|                                         |                                                       |    |                                                                                     | PGA-PCL            |                        |                      |                      |               | Quill Monoderm |                 |           |         |             | ø                                | +          | 7 T 50-62%                                                                                             | 14 T 27-51%        |                        |                       |                         |         |
| Polyglactin 910                         |                                                       |    |                                                                                     | PGA                | Velosorb Fast          | Maxon                | Vicryl rapide        | Novosyn Quick |                |                 |           |         | geflochten  | Polyglactin 370 + Calciumstearat |            |                                                                                                        |                    | 5                      | 12                    | 42                      |         |
| Polyglactin 910                         | Copolymer Glykolt (Polyglactin 370)+ 10% L-Laktat (B) |                                                                                     |                                                                                     | PGLA90             | Polysorb               |                      | Vicryl               | Novosyn       |                | Serafit         |           |         | geflochten  |                                  |            |                                                                                                        |                    | 21                     | 35                    | 56-70                   |         |
| Polyglactin 910                         |                                                       |    |                                                                                     |                    |                        |                      | Vicryl Plus          |               |                |                 |           |         | geflochten  |                                  |            |                                                                                                        |                    | 2135                   |                       | 56-70                   |         |
| Poly-p-dioxanon                         |                                                       |    |                                                                                     |                    | Marisorb               |                      |                      |               |                |                 |           |         | monofil     |                                  |            |                                                                                                        |                    | 42-50                  | 90-100                | 180-210                 |         |
| Glykolid-ε-Caprolacton-Mischpolymerisat |                                                       |    |                                                                                     |                    | Macricryl              |                      |                      |               |                |                 |           |         | monofil     |                                  |            |                                                                                                        |                    | 7                      | 28-35                 | 90-120                  |         |
| Polyglyton621                           | Glykonat                                              |   |   | PGC 25             | Biosyn                 | Biosyn               | Monocryl             | Monosyn       | Serafast       |                 | B +       | Violett | monofil     | ø                                |            |                                                                                                        | 14 T 50%           | 7                      | 28-12-15              | 90-120 B60-90           |         |
|                                         | Glykonat                                              |  |                                                                                     |                    | Caprosyn               |                      | Monocryl             | Monosyn Quick |                |                 | +         |         | monofil     | ø                                |            | 5 T 70-80%                                                                                             | 10 T 20-30%        |                        |                       | 56                      |         |
|                                         | antibakteriell beschichtet                            |                                                                                     |                                                                                     |                    |                        |                      | Monocryl +           |               |                |                 |           |         |             |                                  |            |                                                                                                        |                    |                        |                       |                         |         |
| Polyglecaprone 25                       | Poly-Dioxane??                                        |                                                                                     |  | PGC 25             |                        | Maxon                | PDS II Monocryl Plus |               |                |                 |           | Violett | monofil     | ø                                |            |                                                                                                        |                    | 7                      | 28-35                 | 90-120 180-210          |         |
| Poly-p-dioxanon                         | Poly-p-dioxanon                                       |  |                                                                                     | PDX                |                        | Maxon                | PDSII                | MonoPlus      | Serasynth      |                 |           |         | monofil     | ø                                |            |                                                                                                        | 28 T 50-70%        |                        |                       | 180-220                 |         |
| Polydioxanon                            |                                                       |  |                                                                                     | PDO                |                        |                      | PDS                  |               |                |                 |           |         | monofil     |                                  |            |                                                                                                        |                    | 60% 42T                | 70                    | 180-240                 |         |
| Polydioxanon                            |                                                       |  |                                                                                     | PDO                |                        |                      |                      |               | Serasynth      |                 |           | Violett | monofil     | ø                                |            |                                                                                                        |                    | 28-42                  |                       | 180-210                 |         |
| Polydioxanon                            |                                                       |  |                                                                                     | PDO                |                        |                      |                      |               | Serasynth Loc  |                 |           | Violett | monofil     | ø                                |            |                                                                                                        |                    | 28-42                  |                       | 180-210                 |         |
| Polydioxanon                            |                                                       |                                                                                     |                                                                                     | PDO                |                        |                      |                      | Quill PDO     |                |                 |           |         | monofil     |                                  | +          | USP 3/30<br>2, 4 Wochen 80 % & 6 Wochen 40 % USP 4/30<br>2 Wochen 67 % & 4 Wochen 50 % & 6 Wochen 37 % |                    |                        |                       | 120-180                 |         |
| Polydioxanon                            | Poly(P-Dioxanon)                                      |  |                                                                                     | PDO                |                        |                      |                      | PDO Resorba   |                | +               |           | Violett | monofil     |                                  |            |                                                                                                        |                    | 42                     |                       | 175-217                 |         |

| resorbierbare Nahtmaterialien              |                                                                           | EASSI Symbole | EASSI Symbole | Abkürzung Rohstoff | Handelsname Medtronic* | Covidien Tyco (USSC/) | Ethicon *   | B. Braun *           | Resorba*                      | Serag-Wiesner*     | ungefärbt | Farbe                   | Fadenaufbau   | Beschichtung  | Widerhaken | Reissfestigkeit I                                          | Reissfestigkeit II | Reisskraft ca. [T] 50% | Reisskraft ca. [T] 0% | Resorption komplett [T] | Hinweis |                                     |
|--------------------------------------------|---------------------------------------------------------------------------|---------------|---------------|--------------------|------------------------|-----------------------|-------------|----------------------|-------------------------------|--------------------|-----------|-------------------------|---------------|---------------|------------|------------------------------------------------------------|--------------------|------------------------|-----------------------|-------------------------|---------|-------------------------------------|
|                                            | antibakteriell beschichtet                                                |               |               |                    |                        |                       | PDS Plus    |                      |                               |                    |           |                         |               |               |            |                                                            |                    |                        |                       |                         |         |                                     |
| <b>Polydioxanone</b>                       |                                                                           |               |               | PDO                |                        |                       | PDS Kordel  |                      |                               |                    |           |                         | geflochten    |               |            |                                                            |                    |                        |                       |                         |         |                                     |
| <b>Glycomer 631</b>                        | glycolide, dioxanone and trimethylene carbonate                           |               |               |                    |                        | Biosyn                |             |                      |                               |                    |           |                         |               |               |            |                                                            |                    |                        |                       |                         |         |                                     |
| <b>Poly-4-Hydroxybutyrat</b>               |                                                                           |               |               |                    |                        |                       |             | 2-0 - 1              |                               |                    |           |                         | monofil       | ø             |            | USP 2/0, 3/0: 1. Monat<br>3 Monate<br>5 Monate<br>USP 1, 0 |                    |                        |                       |                         |         |                                     |
| <b>Catgut</b>                              | Collagen treated with salt                                                |               |               |                    |                        | chromic gut           | chromic gut | Softcat Chrom        |                               |                    |           |                         | verdrillt     | ø             |            |                                                            |                    | 14-21                  |                       |                         | 90      |                                     |
| <b>Catgut</b>                              |                                                                           |               |               |                    |                        | gut                   | gut         | Softcat plain        |                               |                    |           |                         | verdrillt     | ø             |            |                                                            |                    | 7-10                   |                       |                         | 70      |                                     |
| <b>nicht resorbierbare Nahtmaterialien</b> |                                                                           |               |               |                    |                        |                       |             |                      |                               |                    |           |                         |               |               |            |                                                            |                    |                        |                       |                         |         |                                     |
| <b>Polyvinylidenfluorid</b>                |                                                                           |               |               | PVDF               | Marlon                 |                       |             |                      |                               |                    |           |                         | monofil       | ø             |            |                                                            |                    |                        |                       |                         |         |                                     |
| <b>Polyamid</b>                            |                                                                           |               |               | PA                 |                        |                       |             |                      | Nylon                         |                    |           | Schwarz                 | monofil       | ø             |            |                                                            |                    |                        |                       |                         |         |                                     |
| <b>Polyamid</b>                            |                                                                           |               |               | PA                 |                        |                       |             |                      | Seralon                       |                    | +         | Blau                    | monofil       | ø             |            |                                                            |                    |                        |                       |                         |         |                                     |
| <b>Polyamid</b>                            | Polyamid titanisiert                                                      |               |               | PA/Ti              |                        |                       |             |                      | Seratan                       |                    | +         | Blau                    | monofil       | +             |            |                                                            |                    |                        |                       |                         |         |                                     |
| <b>Polyamid</b>                            | Nylon                                                                     |               |               | PA                 |                        | Dermalon              | Ethilon     | Dafilon              |                               |                    |           | Blau                    | monofil       | ø             |            |                                                            |                    |                        |                       |                         |         |                                     |
| <b>Polyamid</b>                            | Nylon                                                                     |               |               | PA                 |                        |                       | Nuralon     | Trelon               |                               |                    |           | +                       | Schwarz       | pseudomonofil | Silikon    |                                                            |                    |                        |                       |                         |         |                                     |
| <b>Polyamid</b>                            |                                                                           |               |               | PA                 |                        |                       |             |                      | Supramid                      |                    | +         | Schwarz                 | gezwirnt      | ummantelt     |            |                                                            |                    |                        |                       |                         |         |                                     |
| <b>Polyamid 6/6.6</b>                      | (Copolymerisat) Fadenseele Polyamid 6.6 (Polymer von Hexamethyldiamin und |               |               | PA                 |                        |                       |             |                      | Supramid (Sw W)               |                    | +         | Schwarz Weiss           | monofil       | ø             |            |                                                            |                    |                        |                       |                         |         | allmähliche Degeneration, Hautnähte |
| <b>Polyamid 6/6.6</b>                      | (Copolymerisat) Fadenseele Polyamid 6.6 (Polymer von Hexamethyldiamin und |               |               | PA                 |                        |                       |             |                      | Supramid (Sw W)               |                    | +         | Schwarz                 | pseudomonofil | ø             |            |                                                            |                    |                        |                       |                         |         | allmähliche Degeneration, Hautnähte |
| <b>Polyamid 6/6.6</b>                      |                                                                           |               |               | PA                 |                        |                       |             | Dafilon              | Nylon                         |                    | + PA6     | Blau PA6/6.6 Schwarz    | monofil       |               |            |                                                            |                    |                        |                       |                         |         |                                     |
| <b>Polyamid 6/6.6</b>                      | spezielle Bearbeitung: weich geschmeidig                                  |               |               |                    |                        |                       |             |                      | Resolon                       |                    |           | Blau                    | monofil       |               |            |                                                            |                    |                        |                       |                         |         |                                     |
| <b>Polyester</b>                           |                                                                           |               |               | PET                |                        | ø                     | Mersilene   | Dagrofil             |                               |                    |           | B Grün + weiß           | geflochten    | ø             |            |                                                            |                    |                        |                       |                         |         |                                     |
| <b>Polyester</b>                           |                                                                           |               |               | PET                |                        |                       |             |                      | Sulene                        |                    | +         | Grün                    | multifil      | +             |            |                                                            |                    |                        |                       |                         |         |                                     |
| <b>Polyester</b>                           | Polykondensation Ethylenglykol + Terephthalsäure                          |               |               | PET                |                        | Ticron / Surgidac     | Ethibond    | Premicron/ Synthofil | Polyester                     | Terylene           | +         | (SW) Weiß&Grün (E) grün | geflochten    | Silikon / PVA |            |                                                            |                    |                        |                       |                         |         |                                     |
| <b>Polypropylen</b>                        |                                                                           |               |               | PP                 | Maprolen               |                       |             |                      |                               | Mopylen            |           |                         | monofil       |               |            |                                                            |                    |                        |                       |                         |         |                                     |
| <b>Polypropylen</b>                        |                                                                           |               |               | PP                 |                        |                       |             |                      | STRATAFIX Spiral Polypropylen |                    |           |                         |               |               |            |                                                            |                    |                        |                       |                         |         |                                     |
| <b>Polypropylen</b>                        |                                                                           |               |               | PP                 |                        |                       |             |                      |                               | Quill Polypropylen |           |                         | monofil       |               | +          |                                                            |                    |                        |                       |                         |         |                                     |
| <b>Polypropylen</b>                        |                                                                           |               |               | PP                 |                        |                       | Prolene     |                      |                               |                    |           |                         | monofil       |               |            |                                                            |                    |                        |                       |                         |         |                                     |
| <b>Polypropylen, Polyethylen</b>           |                                                                           |               |               | PP                 | Suripro II Surgipro    | Surgipro Novafil      | Prolene     | Optilene             |                               |                    |           | Blau                    | monofil       | ø             |            |                                                            |                    |                        |                       |                         |         |                                     |

| resorbierbare Nahtmaterialien | EASSI Symbole | EASSI Symbole | Abkürzung Rohstoff | Handelsname Medtronic* | Covidien Tyco (USSC/ | Ethicon *        | B. Braun * | Resorba* | Serag-Wiessner* | ungefärbt | Farbe               | Fadenaufbau      | Beschichtung       | Widerhaken | Reissfestigkeit I | Reissfestigkeit II | Reisskraft ca. [T] 50% | Reisskraft ca. [T] 0% | Resorption komplett [T] | Hinweis |  |
|-------------------------------|---------------|---------------|--------------------|------------------------|----------------------|------------------|------------|----------|-----------------|-----------|---------------------|------------------|--------------------|------------|-------------------|--------------------|------------------------|-----------------------|-------------------------|---------|--|
| Polyethylenterephthalat       |               |               | PET                | Polyester              |                      |                  |            |          |                 |           |                     | geflochten       | +                  |            |                   |                    |                        |                       |                         |         |  |
| Polyethylenterephthalat       |               |               | PET                | Polyester              |                      |                  |            |          |                 |           |                     | geflochten       |                    |            |                   |                    |                        |                       |                         |         |  |
| Poly (Hexafluoropropylen-VDF) |               |               |                    |                        |                      | PRONOVO          |            |          |                 |           |                     |                  |                    |            |                   |                    |                        |                       |                         |         |  |
| Naturseide                    |               |               | SILK               | Naturseide-S           |                      |                  |            |          | Seraflex        |           |                     | geflochten       | +                  |            |                   |                    |                        |                       |                         |         |  |
| Naturseide                    |               |               | SILK               |                        | Sofsilk              | Perma-Hand-Seide | Silikam    |          |                 |           | BSchwarz/BWeiß/Blau | geflochten,      | Wachs, Silikon     |            |                   |                    |                        |                       |                         |         |  |
| Stahldraht                    |               |               | STEEL              | Stahldraht             |                      |                  |            |          | Seranax         |           |                     | monofil          |                    |            |                   |                    |                        |                       |                         |         |  |
| Stahldraht                    |               |               | STEEL              | Stahldraht             |                      |                  |            |          |                 |           |                     | geflochten       |                    |            |                   |                    |                        |                       |                         |         |  |
| Stahldraht                    |               |               | STEEL              | Steel                  |                      | Stainless steel  | Steelex    |          |                 |           |                     | monofil verdreht | B Polyethylenhülle |            |                   |                    |                        |                       |                         |         |  |
| Polyvinylidenfluorid          |               |               | PVDF               |                        |                      |                  |            |          |                 |           | Blau                | monofil          |                    |            |                   |                    |                        |                       |                         |         |  |
| Ligaturen/Unterbindungen      |               |               |                    |                        |                      |                  |            |          |                 |           |                     |                  |                    |            |                   |                    |                        |                       |                         |         |  |
| Polyglactin 910               |               |               |                    |                        |                      | Vicryl           |            |          |                 |           |                     | geflochten       |                    |            |                   |                    |                        |                       |                         |         |  |
| Polyglacaprone 25             |               |               |                    |                        |                      | MONOCRYL         |            |          |                 |           |                     | monofil          |                    |            |                   |                    |                        |                       |                         |         |  |
| Polydioxanone                 |               |               | PGACL              |                        |                      | PDS              |            |          |                 |           |                     | monofil          |                    |            |                   |                    |                        |                       |                         |         |  |
| Polyester                     |               |               | PET                |                        |                      | Ethibond         |            |          |                 |           |                     | geflochten       |                    |            |                   |                    |                        |                       |                         |         |  |
| Polyester                     |               |               | PET                |                        |                      | Mersilene        |            |          |                 |           |                     | geflochten       |                    |            |                   |                    |                        |                       |                         |         |  |
| Seide                         |               |               |                    |                        |                      | Perma-Hand-Seide |            |          |                 |           |                     | geflochten       |                    |            |                   |                    |                        |                       |                         |         |  |
